# Supplementary material for: miR-26a attenuates colitis and colitis-associated cancer by targeting the multiple intestinal inflammatory pathways
Source: PubMed Central journal article supplement — Mol Ther Nucleic Acids. 2021 Mar 1;24:264–73. doi: 10.1016/j.omtn.2021.02.029 (PMC7985669; doi:10.1016/j.omtn.2021.02.029), 2021-03-01
Supplement: mmc1.pdf [file mmc1.pdf]

OMTN, Volume 24

## **Supplemental information**

### **miR-26a attenuates colitis and colitis-associated cancer by targeting the multiple intestinal inflammatory pathways**

**Wei Zhang, Xianghui Fu, Jiansheng Xie, Hongming Pan, Weidong Han, and Wendong Huang**

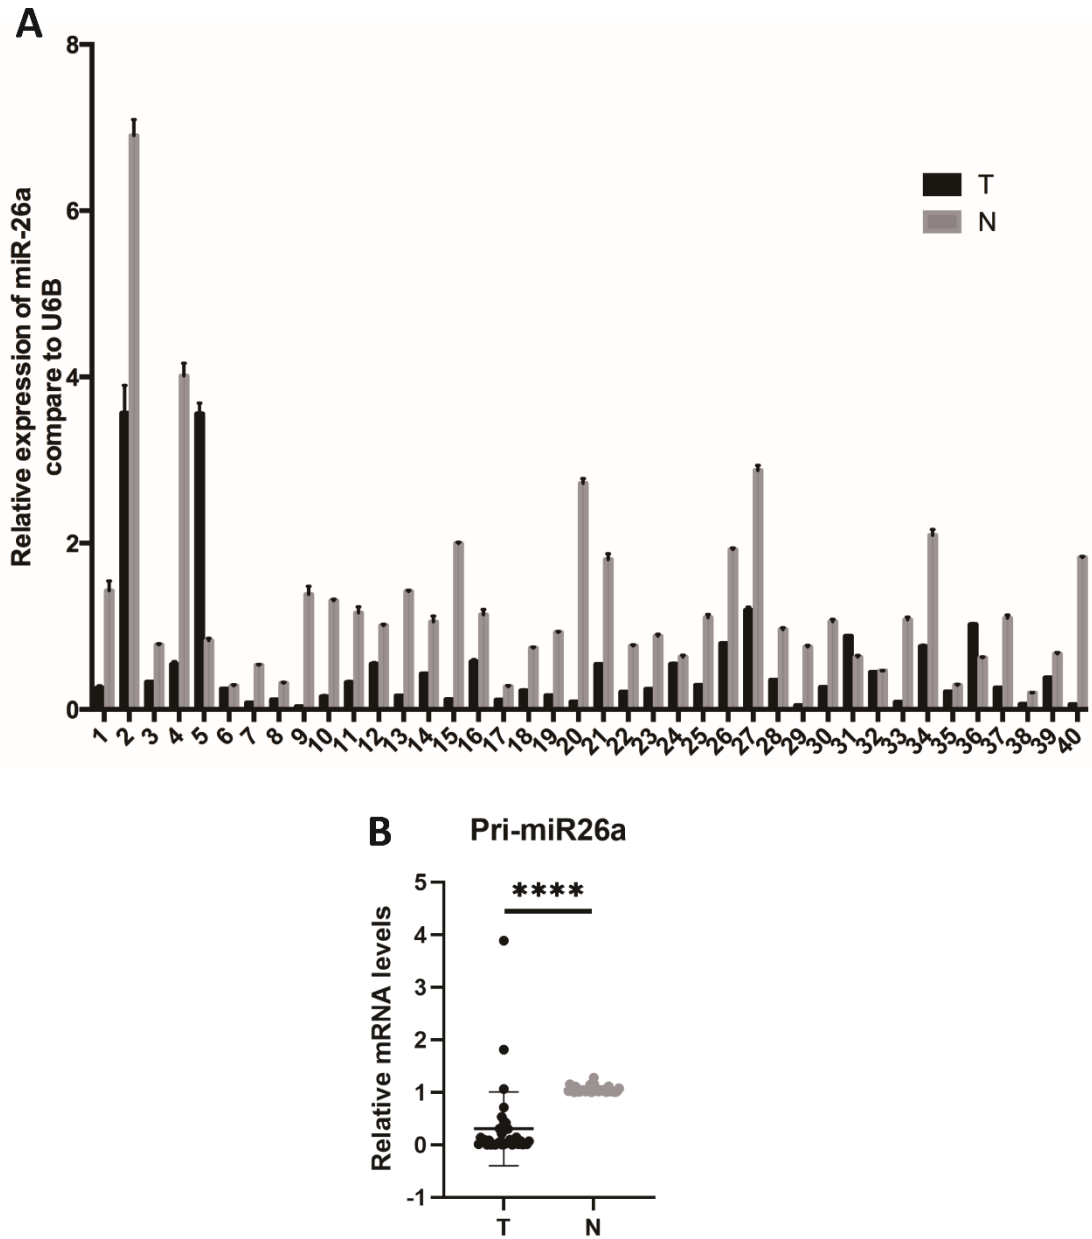

**Fig S1. miR-26a is downregulated in human colorectal cancer samples.**

(A) The expression of miR-26a in colorectal cancer and adjacent normal tissues from 40 patients was examined by qPCR. miR-26a was downregulated in 37 tumor samples (all samples except #5, #31, and #36) compared with the corresponding adjacent normal tissues. (B) The expression level of Pri-miR26a in colorectal cancer and adjacent normal tissues from 40 patients were determined by qPCR. T: tumor; N: non-tumor. \*\*\*\*P<0.0001.

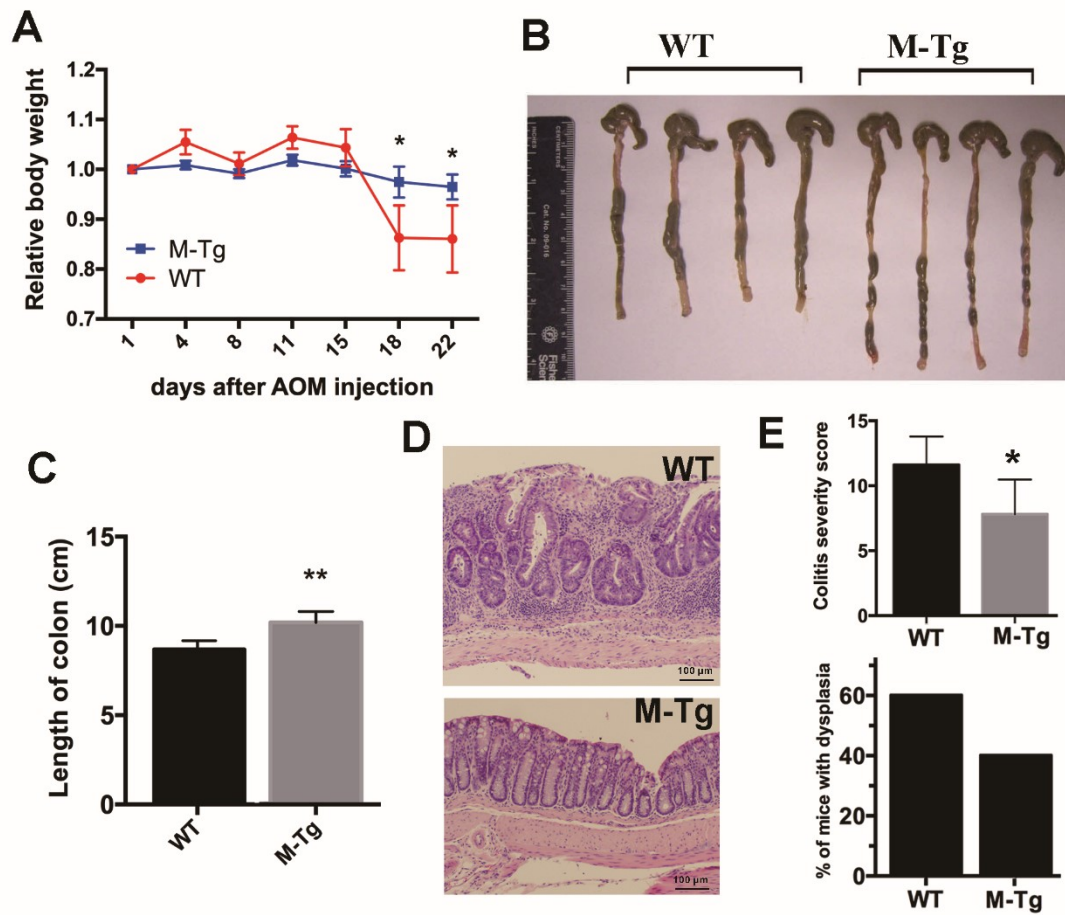

**Fig S2. miR-26aTg plays a protective role in AOM/DSS-induced tumorigenesis.**

M-miR-26aTg mice and their WT littermates were injected with AOM (10 mg/kg), and 7 days later, mice were challenged with 1% DSS provided in the drinking water for 7 consecutive days, followed by standard drinking water. **(A)** The body weight was measured every 4 days until the mice were sacrificed. **(B-C)** Mice were sacrificed on day 22 for colon length measurement. **(D)** Representative images of H&E-stained colon sections. **(E)** H&E-stained colon sections were scored as described in the Materials and Methods section and classified as dysplasia or adenocarcinoma. Data with error bars are presented to indicate the mean  $\pm$  SD values. \* $P < 0.05$ , \*\* $P < 0.01$ .

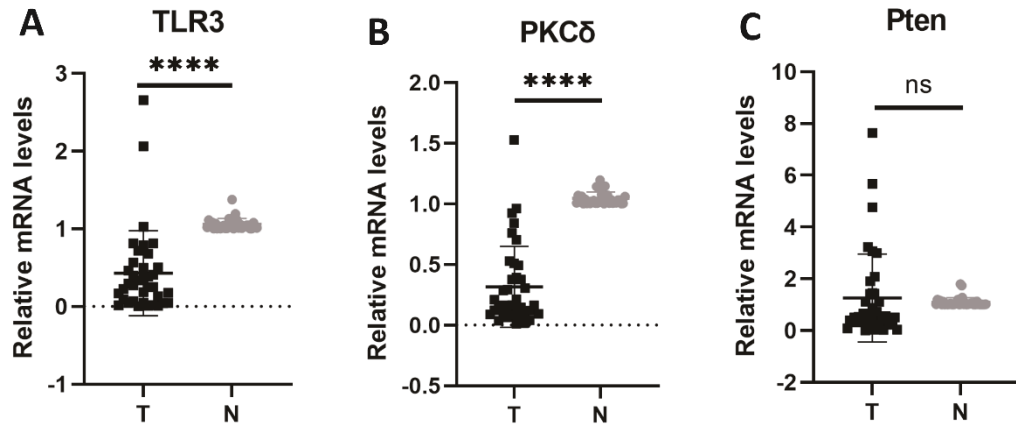

**Fig S3. TLR3 and PKCδ were downregulated in human colorectal cancer samples.**

The expression level of TLR3 (A), PKCδ (B) and Pten (C) in colorectal cancer and adjacent normal tissues from 40 patients were determined by qPCR. T: tumor; N: non-tumor. \*\*\*\*P<0.0001.

**Table S1. Primers used for qPCR.**

| Gene name                 | Primer                                                                       |
|---------------------------|------------------------------------------------------------------------------|
| miR-26a<br>(mouse)        | F: 5'- UUCAAGUAAUCCAGGAUAGGCU-3'<br>R: 5'-CATGATCAGCTGGGCCAAGA-3'            |
| miR-26a<br>(human)        | F: 5'-CATGATCAGCTGGGCCAAGAAGCCTATCCTGG-3'<br>R: 5'-CATGATCAGCTGGGCCAAGA-3'   |
| Pri-miR26a<br>(human)     | F: 5'-CGTGGCCTCGTTCAAGTAATC-3'<br>R: 5'-AACCAAGAATAGGCCCATTTGG-3'            |
| MIP2<br>(mouse)           | F: 5'- CCAAGGGTTGACTTCAAGAAC-3'<br>R: 5'- AGCGAGGCACATCAGGTACG-3'            |
| TNF $\alpha$<br>(mouse)   | F: 5'-AGGGTCTGGGCCATAGAACT-3'<br>R: 5'-CCACCAGCTCTTCTGTCTAC-3'               |
| IL1b<br>(mouse)           | F: 5'- GTGGCTGTGGAGAAGCTGTG-3'<br>R: 5'- GAAGGTCCACGGGAAAGACAC-3'            |
| ICAM1<br>(mouse)          | F: 5'- TGTTTCCTGCCTCTGAAGC-3'<br>R: 5'- CTTCGTTTGTGATCCTCCG-3'               |
| KC<br>(mouse)             | F: 5'- CAATGAGCTGCGCTGTCAGTG-3'<br>R: 5'- CTTGGGGACACCTTTTAGCATC-3'          |
| IL6<br>(mouse)            | F: 5'-GTATGAACAACGATGATGCACTTG-3'<br>R: 5'-ATGGTACTCCAGAAGACCAGAGGA-3'       |
| MCP1<br>(mouse)           | F: 5'- ACCACAGTCCATGCCATCAC-3'<br>R: 5'- TTGAGGTGGTTGTGGAAAAG-3'             |
| GSK3 $\beta$<br>(mouse)   | F: 5'- GGTGAATCGAGAAGAGCCAT-3'<br>R: 5'- CTCCTGAGTCACAAAGTTTG-3'             |
| TLR3<br>(mouse)           | F: 5'- CCCCTTTGAACTCCTCTTC-3'<br>R: 5'- TTTCGGCTTCTTTTGATGCT-3'              |
| TLR3<br>(human)           | F: 5'-TTGCCTTGTATCTACTTTTGGGG-3'<br>R: 5'-TCAACACTGTTATGTTTGTGGGT-3'         |
| PTEN<br>(mouse)           | F: 5'- CTGGTGTAATGATATGTGCA -3'<br>R: 5'- AACGGCTGAGGGAACTC -3'              |
| PTEN<br>(human)           | F: 5'-TGGATTCCACTTAGACTTGACCT-3'<br>R: 5'-GGTGGGTATGGTCTTCAAAGG-3'           |
| PKC $\delta$<br>(mouse)   | F: 5'-GCTCCCTGCAAGTTGAGGAC<br>R: 5'-ACACGGCCTTCATAGATGTGG                    |
| PKC $\delta$<br>(human)   | F: 5'-AACCATGAGTTTATCGCCACC-3'<br>R: 5'-AGCGTTACATTGCCTGCATTT-3'             |
| $\beta$ -actin<br>(mouse) | F: 5'- AGAAGGAGATCACTGCCCTGGCACC -3'<br>R: 5'- CCTGCTTGCTGATCCACATCTGCTG -3' |
